# Supplementary material for: Cellular Interactions and Formation of an Epithelial “Nanocoating-Like Barrier” with Mesoporous Silica Nanoparticles
Source: MDPI journal article supplement (doi:10.3390/nano6110192), 2016-10-27
Supplement: s1 [file s1]

# Supplementary Materials: Cellular Interactions and Formation of an Epithelial 'Nanocoating-Like Barrier' with Mesoporous Silica Nanoparticles

Xuan Li, Ka Yan Pang, Tsz Wing Ng, Ping Chung Leung, Cheng Fei Zhang, Ken Cham-Fai Leung and Lijian Jin

## 1. Characterization of the RITC-NPs

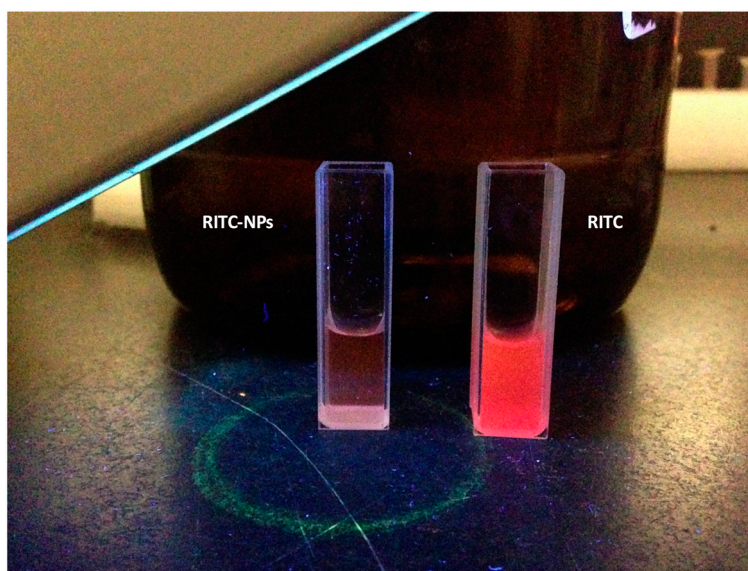

**Figure S1.** The fluorescence of the RITC-NP dispersion (100  $\mu\text{g/mL}$ ) and the RITC ethanol solution (28  $\mu\text{g/mL}$ ) under UV excitation.

## 2. The Histological Profiles of the RHGE and Porcine Ear Skin

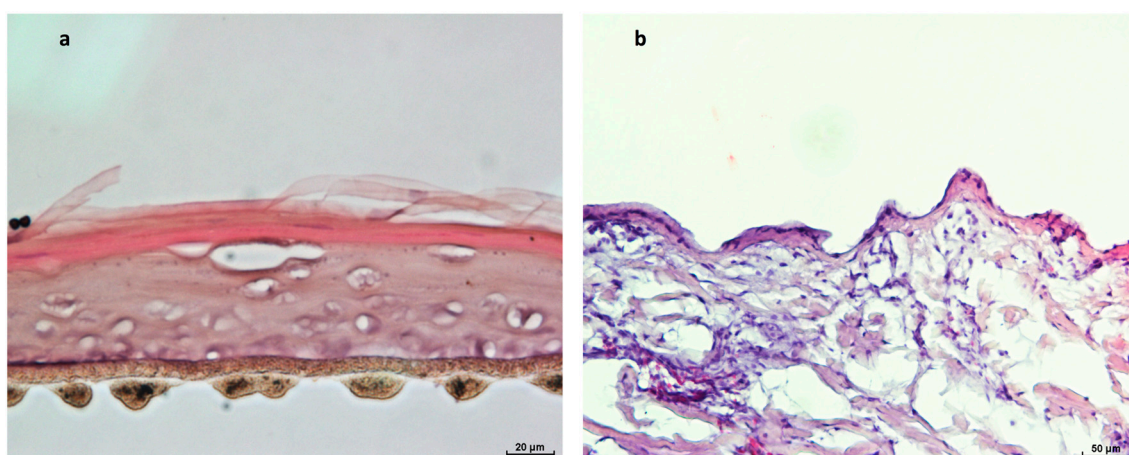

**Figure S2.** Histological images of the selected epithelial cryosections. Representative sections of RHGE (a) and isolated porcine ear skin (b) stained with hematoxylin and eosin (H&E) show the stratum corneum layer (red color) and the underlying epithelial cells (dark brown in RHGE and light blue in porcine ear skin).

### 3. The Presence of RITC-NPs in Hair Follicles of Porcine Ear Skin

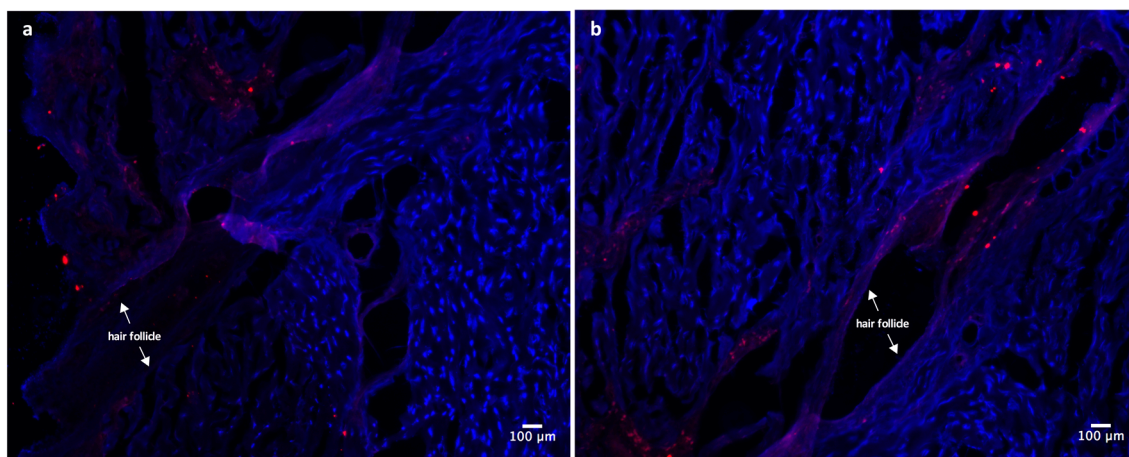

**Figure S3.** The fluorescent images of the RITC-NPs in upper (a) and lower (b) parts of a hair follicle of porcine ear skin after 24 h of treatment. The cell nuclei and RITC-NPs were detected by blue and red fluorescence, respectively.
